# Supplementary material for: Remarkable photocurrent of p-type dye-sensitized solar cell achieved by size controlled CuGaO2 nanoplates
Source: Royal Society of Chemistry journal article supplement (doi:10.1039/c3ta14072e), 2013-11-26
Supplement: c3ta14072e.pdf [file c3ta14072e.pdf]

## Supplementary Information

# Remarkable Photocurrent of P-type Dye-sensitized Solar Cell Achieved by Size Controlled CuGaO<sub>2</sub> Nanoplates

Zhen Xu,<sup>a</sup> Dehua Xiong,<sup>a</sup> Huan Wang,<sup>a</sup> Wenjun Zhang,<sup>a</sup> Xianwei Zeng,<sup>a</sup> Liqun Ming, Wei Chen,<sup>\*a</sup>  
Xiaobao Xu,<sup>a</sup> Jin Cui,<sup>a</sup> Mingkui Wang,<sup>\*a</sup> Satvasheel Powar,<sup>b</sup> Udo Bach,<sup>b</sup> Yi-Bing Cheng<sup>ab</sup>

<sup>a</sup> Michael Grätzel Centre for Mesoscopic Solar Cells, Wuhan National Laboratory for Optoelectronics and College of Optoelectronic Science and Engineering, Huazhong University of Science and Technology, Wuhan 430074, P. R. China. Fax: 86 8779 3867; Tel: 86 8779 3867; E-mail: [wnluchenwei@hust.edu.cn](mailto:wnluchenwei@hust.edu.cn) (prof. W. Chen); [mingkui.wang@hust.edu.cn](mailto:mingkui.wang@hust.edu.cn) (prof. M.K. Wang)

<sup>b</sup> Department of Materials Engineering, Monash University, Melbourne, Victoria, 3800, Australia

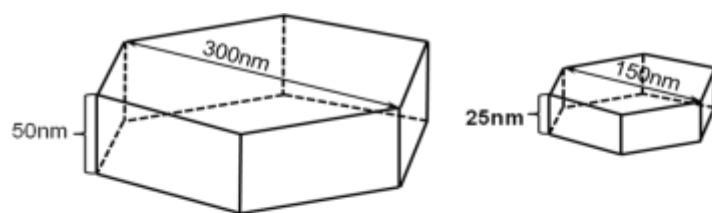
$$\begin{aligned} BET_1 &= \frac{S_1}{V_1 * \rho} & BET_2 &= \frac{S_2}{V_2 * \rho} \\ S_1 &= 2 * \frac{3\sqrt{3}}{8} * 300^2 + 6 * 50 * 300 & S_2 &= 2 * \frac{3\sqrt{3}}{8} * 150^2 + 6 * 25 * 150 \\ V_1 &= \frac{3\sqrt{3}}{8} * 300^2 * 50 & V_2 &= \frac{3\sqrt{3}}{8} * 150^2 * 25 \\ \frac{BET_1}{BET_2} &= \frac{S_1 * V_2}{S_2 * V_1} = \frac{2 * \frac{3\sqrt{3}}{8} * 300^2 + 6 * 50 * 300}{2 * \frac{3\sqrt{3}}{8} * 150^2 + 6 * 25 * 150} * \frac{\frac{3\sqrt{3}}{8} * 150^2 * 25}{\frac{3\sqrt{3}}{8} * 300^2 * 50} = \frac{1}{2} \end{aligned}$$

**Fig. S1.** Calculation on the BET surface area difference between two kinds of ideal hexagonal nanoplates, one with 150 nm diameter and 25 nm thickness, another one with 300 nm diameter and 50 nm thickness, the size of which are just corresponding to the nanoplates synthesized from 5 °C and 25 °C precursors respectively.

## Supplementary Information

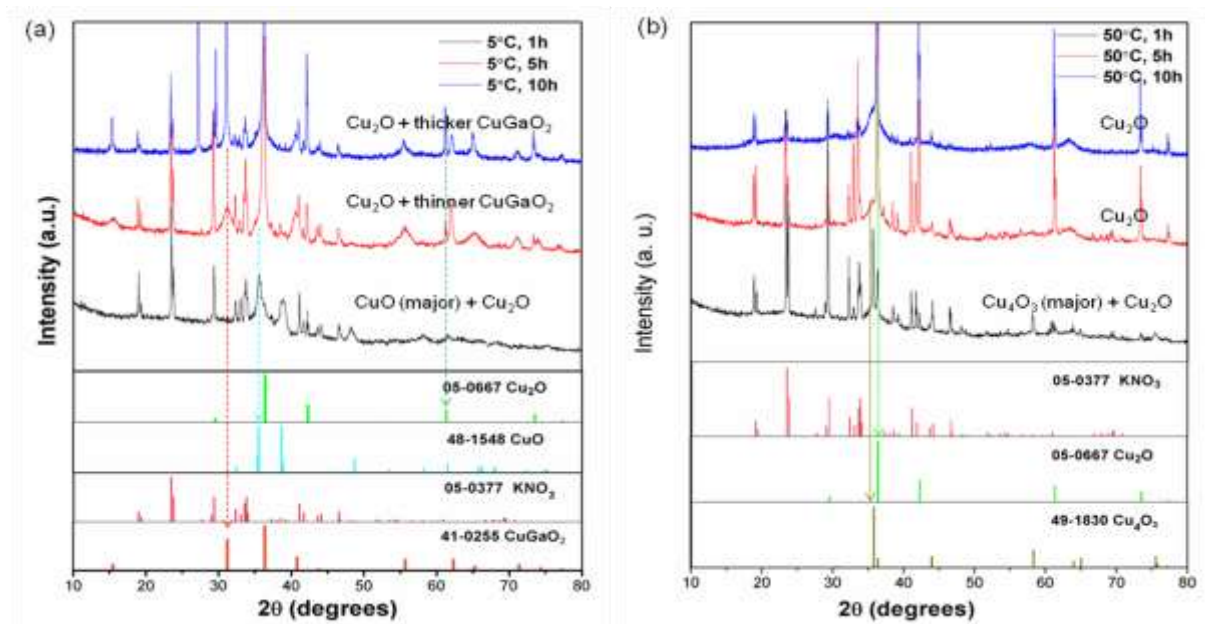

**Fig. S2.** XRD patterns of the intermediates obtained after hydrothermal treatment on (a) the 5 °C precursor and (b) the 50 °C precursor for 1 hour, 5 hours and 10 hours, respectively.

For the 5 °C precursor, it can be found a general phase transition from Cu<sub>2</sub>(OH)<sub>3</sub>NO<sub>3</sub>, to CuO, subsequent to Cu<sub>2</sub>O, and gradually to CuGaO<sub>2</sub> in the first several hours of hydrothermal synthesis. After 5 hours, the CuGaO<sub>2</sub> nanoplates begin to form. The thickness of CuGaO<sub>2</sub> nanoplates becomes thicker after 10 hours hydrothermal synthesis. Such processes can be judged from the peaks labeled by the red arrow owing to CuGaO<sub>2</sub>. For the 50 °C precursor, it can be found that the phase transition is as follows: CuO to Cu<sub>4</sub>O<sub>3</sub>, and subsequent to Cu<sub>2</sub>O. After 10 hours hydrothermal treatment, no CuGaO<sub>2</sub> nanoplates have formed. It might be due to that the preformed CuO excessively grows to too thick Cu<sub>2</sub>O seeds, hindering the subsequent Ga<sup>3+</sup> diffusion into the Cu<sub>2</sub>O lattice. So, the phase transition from Cu<sub>2</sub>O to CuGaO<sub>2</sub> has been retarded. It is obviously that, the Cu<sub>2</sub>O seeds formation time is much shorter for the 5 °C precursor than that for the 50 °C precursor, which might be responsible for the different size control effect on Cu<sub>2</sub>O and CuGaO<sub>2</sub> nanoplates.

## Supplementary Information

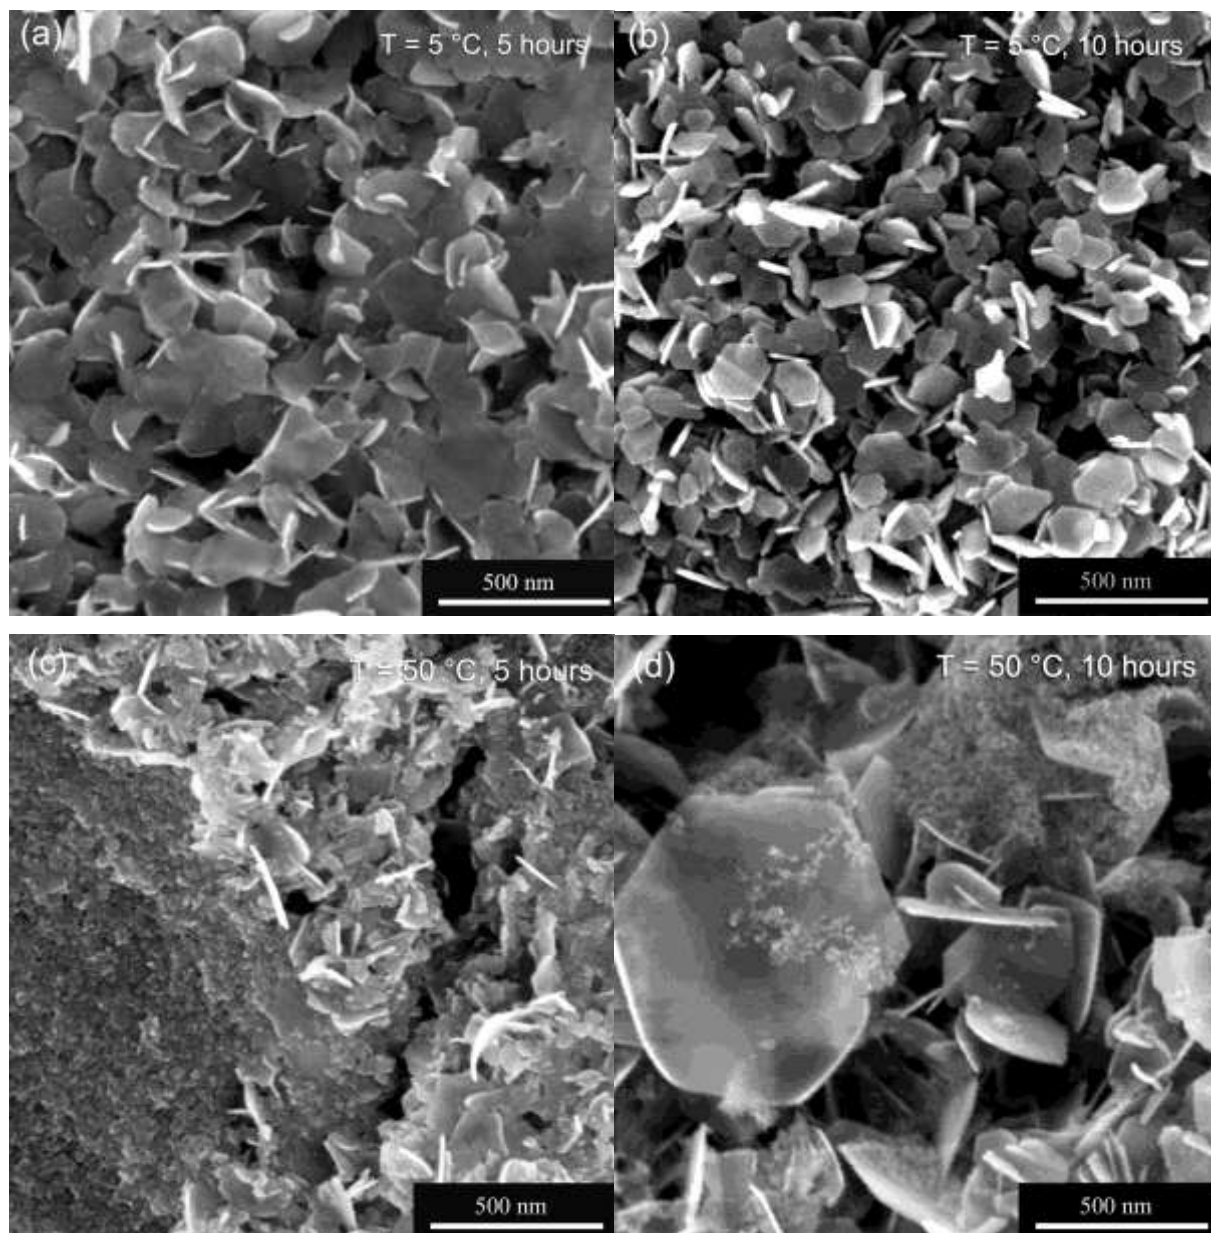

**Fig. S3.** SEM images of the intermediates obtained after hydrothermal treatment on the 5 °C precursor for (a) 5 hours and (b) 10 hours, and the 50 °C precursor for (c) 5 hours and (d) 10 hours, respectively.

Obviously, the intermediates obtained from the 5 °C precursor are much smaller and more uniform than from the 50 °C precursor. From Fig. S3, it is known the  $\text{Cu}_2\text{O}$  and  $\text{CuGaO}_2$  are both with the morphology of hexagonal nanoplates. The nanoplates in Fig. S3a are observed thinner than that in S3b.

## Supplementary Information

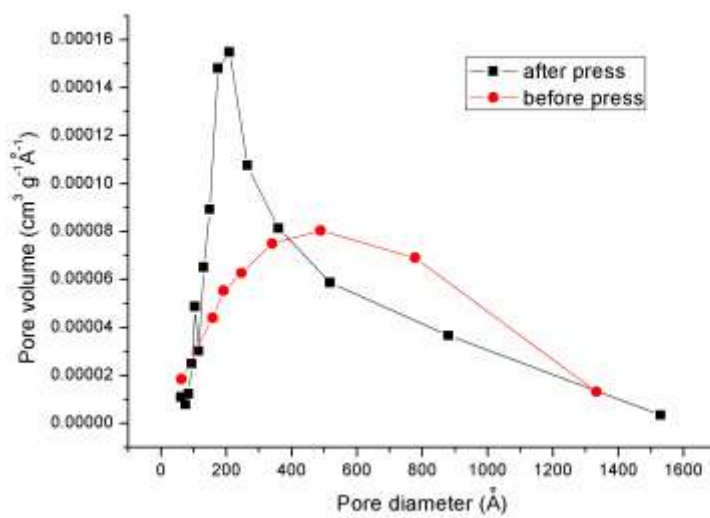

**Fig. S4.** Pore size distributions of CuGaO<sub>2</sub> nanoplates films before and after mechanical press.
